# 1 Durability of SARS-CoV-2 Antibodies from Natural Infection in Children and Adolescents

2

3 Sarah E. Messiah, PhD, MPH<sup>a,b</sup>, Frances Brito, MS<sup>c</sup>, Harold W. Kohl, III, PhD, MSPH<sup>d,e</sup>, Stacia  
4 DeSantis, PhD<sup>c</sup>, Melissa Valerio-Shewmaker, PhD<sup>f</sup>, Jessica Ross, BSc, Michael D. Swartz,  
5 PhD<sup>c</sup>, Ashraf Yaseen, PhD<sup>c</sup>, Steven H. Kelder, PhD, MPH<sup>d</sup>, Shiming Zhang, MS<sup>c</sup>, Onyinye S  
6 Omega-Njemnobi, MD, PhD<sup>d</sup>, Michael O. Gonzalez, MPH<sup>c</sup>, Leqing Wu, MS<sup>c</sup>, Eric Boerwinkle,  
7 PhD<sup>c</sup>, David Lakey, M<sup>g</sup>, Jennifer A. Shuford, MD<sup>h</sup>, Stephen J. Pont, MD<sup>h</sup>

8

9 **Affiliations:** <sup>a</sup>The University of Texas Health Science Center at Houston, School of Public  
10 Health in Dallas, Dallas, TX, USA; <sup>b</sup>Center for Pediatric Population Health, The University of  
11 Texas Health Science Center at Houston, School of Public Health and Children's Health System  
12 of Texas, Dallas, TX, USA; <sup>c</sup>The University of Texas Health Science Center at Houston, School  
13 of Public Health in Houston, Houston, TX, USA; <sup>d</sup>The University of Texas Health Science  
14 Center at Houston, School of Public Health in Austin, Austin, TX, USA; <sup>e</sup>University of Texas at  
15 Austin, Austin, TX, USA; <sup>f</sup>The University of Texas Health Science Center at Houston, School of  
16 Public Health in Brownsville, Brownsville, TX, USA; <sup>g</sup>The University of Texas System, Austin,  
17 TX, USA; <sup>h</sup>Texas Department of State Health Services, Austin, TX, USA

18

19 **Address correspondence to:** Sarah E. Messiah, The University of Texas Health Science Center  
20 at Houston, School of Public Health in Dallas, 2777 N Stemmons Fwy, Dallas, TX  
21 ([Sarah.E.Messiah@uth.tmc.edu](mailto:Sarah.E.Messiah@uth.tmc.edu)), 972-546-2919

22

23 **Short title:** SARS-CoV-2 Antibody Durability from Natural Infection

24

25 **Conflict of Interest Disclosures (includes financial disclosures):** We have no disclosures to  
26 report, financial or otherwise

27

28 **Funding Support:** Texas Department of State Health Services (Contract #HHS000866600001).

29

30 **Role of Funder:** The Texas Department of State Health Services (DSHS) had no role in the  
31 study design, data collection and analysis. Drs. Pont and Shuford are DSHS collaborators on this  
32 project. They assisted in the interpretation of data, in the writing of this report, and in the  
33 decision to submit this paper for publication.

34

35 **Clinical Trials Registration:** N/A

36

37

38

39

40

41

42

43

44

45 **Abbreviations:**

46

47 **COVID-19:** coronavirus disease 2019

48 **DSHS:** Department of State Health Services

49 **SARS-CoV-2:** severe acute respiratory syndrome coronavirus 2

50 **Texas CARES:** Texas COVID-19 Antibody Response Survey

51

52

53

54

WITHDRAWN  
see manuscript DOI for details

55 **Contributors' Statement Page**

56 Drs. Boerwinkle, Lakey, Pont, Shuford, and Valerio-Shewmaker conceptualized and designed  
57 the Texas CARES study.

58 Dr. Messiah drafted the initial manuscript and reviewed and revised the manuscript based on all  
59 other authors input.

60 Drs. Shewmaker, Kohl and Kelder and Jessica Ross designed the data collection instruments and  
61 collected data. Michael Gonzalez programmed all survey questions in REDCap.

62 Frances Brito carried out the initial analyses and reviewed and revised the manuscript. Drs.  
63 DeSantis, Swartz and Yaseen reviewed all analyses.

64 Leqing Wu, Shiming Zhang and Dr. Omega-Njemnobi coordinated and supervised data  
65 collection, and critically reviewed the manuscript for important intellectual content.

66 All authors approved the final manuscript as submitted and agree to be accountable for all  
67 aspects of the work.

68

69

70

71

72

73

74

75

76

77

78

79

80

81

82

83

84

WITHDRAWN  
see manuscript DOI for details

85

## Abstract

86 **Background.** Recent data suggest the SARS-CoV-2 Delta (B.1.617.2) variant is more  
87 transmissible among children compared to the Alpha (B.1.1.7) variant. The true incidence and  
88 longitudinal presence of antibody response to SARS-CoV-2 infection is not known, however.  
89 We provided estimates of antibody response using Texas Coronavirus Antibody REsponse  
90 Survey (Texas CARES) data, a prospective population-based seroprevalence project designed to  
91 assess antibody status over time among the general population throughout the state.

92 **Methods.** In October 2020 Texas CARES began enrolling adults (aged 20-80 years) and children  
93 (aged 5-19 years). Participants were offered a series of three SARS-CoV-2 antibody tests over 6-  
94 8 months, or every 2-3 months that includes the immunoassay for detection of antibodies to the  
95 SARS-CoV-2 nucleocapsid protein (Roche N-test). Descriptive characteristics and COVID-19  
96 infection-related symptom status was determined by questionnaire at the time of enrollment and  
97 prior to each successive blood draw. This analysis included participants ages 5-to-19 years old  
98 who have completed all three antibody assessments.

99 **Results.** From our sample (n=159; mean age 12.5 years, SD 3.6), 96% of those with evidence of  
100 nucleocapsid antibodies at baseline assessment continued to have antibodies > six months later  
101 (mean 7.0 months, SD 0.97). There was no difference in the presence of antibodies by symptom  
102 status (asymptomatic versus symptomatic) or severity (mild-moderate versus severe), sex, age  
103 group, or body mass index group (underweight, healthy weight, overweight, obesity) over the  
104 three antibody measurement timepoints.

105 **Conclusions.** These results suggest that infection-induced antibodies persist and thus may  
106 provide some protection against future infection for at least half a year. 57.9% of the sample  
107 were negative for infection-induced antibodies at their third measurement point, suggesting a  
108 significant proportion of children have still not acquired natural infection.

109

110

111

112

113

114

115

116

117

## 118 **Introduction**

119 As of November 11, 2021 more than 6.6 million children in the United States have tested  
120 positive for COVID-19.<sup>1</sup> In early September, child COVID-19 cases peaked at 252,000 new  
121 cases per week and have declined since but remain extremely high. Since the first week of  
122 September, there have been almost 1.5 million additional child cases.<sup>1</sup> These recent data suggest  
123 the delta (B.1.617.2) variant is more transmissible among children compared to the alpha (  
124 B.1.1.7) variant.<sup>1</sup> These data are particularly troubling as they coincide with school openings  
125 across the country. Information about the durability of SARS-CoV-2-specific natural immune  
126 responses in children is important to inform school-and community-based transmission  
127 mitigation and pediatric vaccination strategies. However, the true incidence and longitudinal  
128 presence of antibody response to SARS-CoV-2 infection is not known in the pediatric population  
129 due to the high proportion of asymptomatic infection<sup>2</sup> and prioritization of testing for adults and  
130 those with severe illness early in the pandemic.

## 131 **Methods**

132 The Texas Coronavirus Antibody REsponse Survey (Texas CARES) is an ongoing prospective  
133 population-based seroprevalence project designed to assess antibody status over time among a  
134 volunteer population throughout the state. The design of Texas CARES has been described  
135 previously<sup>2,3,4</sup> but briefly, includes adults (aged 20-80 years) and children (aged 5-19 years).  
136 Texas CARES enrollment commenced in October 2020. Participants ages 5-to-19 years were  
137 recruited from large pediatric healthcare systems, Federally Qualified Healthcare Centers, urban  
138 and rural pediatric and family medicine practices, health insurance providers, and a social media  
139 campaign throughout the state of Texas. Participants were offered a series of three SARS-CoV-2  
140 antibody tests over 6-8 months, or every 2-3 months, that includes the immunoassay for

141 detection of antibodies to the SARS-CoV-2 nucleocapsid protein (Roche N-test). The  
142 nucleocapsid test uses whole blood and has a sensitivity and specificity exceeding 97%.<sup>5,6</sup>  
143 Descriptive characteristics and COVID-19 infection-related symptom status were determined by  
144 questionnaire at the time of enrollment and prior to each successive blood draw. This analysis  
145 included participants ages 5-to-19 years old who have completed all three antibody assessments.  
146 The presence of SARS-CoV-2 nucleocapsid protein antibodies across the three test timepoints  
147 was explored via generalized linear mixed models with a logit link. Random effects for each  
148 participant were univariately fit. A likelihood ratio test was performed comparing each model to  
149 the intercept-only model to obtain a p-value. All protocols were reviewed and approved by the  
150 University of Texas Health Science Center's Committee for the Protection of Human Subjects,  
151 but also deemed public health practice by the Texas Department of State Health Services IRB.

## 152 **Results**

153 From our sample (n=159; mean age 12.5 years, SD 3.6), 96% of those with evidence of  
154 nucleocapsid antibodies at baseline assessment continued to have antibodies > six months later  
155 (mean 7.0 months, SD 0.97). Two children seroconverted from positive to negative status  
156 between their first and second antibody test. Ten children seroconverted from negative to  
157 positive between their first and second antibody test, and six between their second and third tests,  
158 respectively. There was no difference in the presence of antibodies by symptom status  
159 (asymptomatic versus symptomatic) or severity (mild-moderate versus severe), sex, age group, or  
160 body mass index group (underweight, healthy weight, overweight, obesity) over the three  
161 antibody measurement timepoints. (Table 1)

162 N-test values to detect the presence of IgM, IgG, or IgA antibodies increased from baseline to  
163 timepoint two and then decreased by the third immunoassay assessment. The subsequent

164 downward trend was significant between timepoints 1 and 3 ( $P=0.007$ ) and timepoints 2 and 3  
165 ( $P<0.001$ ) (Figure1).

## 166 **Discussion**

167 The data reported here show that the majority of children followed for > six months and  
168 who had three successive antibody test results available for analysis retained SARS-CoV-2  
169 antibodies over the entire time period regardless of age, sex, COVID-19 symptom status and  
170 severity, and body mass index. These results suggest that infection-induced antibodies persist  
171 and thus may provide some protection against future infection for at least half a year. We were  
172 unable to confirm COVID-19 infection prior to the baseline assessment, thus these data cannot  
173 confirm durability beyond six months. It should also be noted that well over half (57.9%) of the  
174 sample were negative for infection-induced antibodies at their third measurement point,  
175 suggesting a significant proportion of children are still immune-naïve to SARS-CoV-2 due to  
176 natural infection. As such, vaccines have an important role to play in providing protection  
177 against COVID-19 for children aged 12 years and older, and for those < 12 years as they become  
178 eligible.

179

180

181 **Acknowledgements:**

182 This work was supported by the Texas Department of State Health Services and the University  
183 of Texas System. We would like to acknowledge the University of Texas Health Science Center  
184 at Houston, School of Public Health's Texas CARES investigative team for their contribution to  
185 participant recruitment, data collection, statistical analysis, and data visualization including  
186 Sarah E Messiah, PhD; Melissa Valerio-Shewmaker, PhD, MPH; Steven Kelder, PhD, MPH;  
187 Harold W Kohl, PhD; Kimberly Aguilard, DrPH; Michael Swartz, PhD; Stacia DeSantis, PhD;  
188 Ashraf Yaseen, PhD; Luis León-Novelo, PhD; Eric Boerwinkle, PhD; Jessica Ross, BS; Frances  
189 Brito, MS; Michael Gonzalez, MS; Leqing Wu, PhD; Onyinye Omega Njemnobi, MBBS, MPH;  
190 Shiming Zhang, MS; Joy Yoo, BS; Tianyao Hao, MS; Cesar Pinzon Gomez, MD; Karina Farias,  
191 BA; Ashleigh Gil, MPH; David Lakey, MD; Jennifer Shuford, MD, MPH; Stephen Pont, MD,  
192 MPH. This analysis would not have been possible without the partnership of many.

193  
194 The TX CARES investigation team would like to thank Children's Health System of Texas,  
195 Dallas, TX; Cook Children's Forth Worth, TX; Covenant Health, Lubbock, TX; Driscoll  
196 Children's, Corpus Christi, TX; El Paso Children's, El Paso, TX; UTHealth McGovern,  
197 Houston, TX; UTHealthRGV, Rio Grande Valley, TX; UTHealth Tyler, Tyler, TX; Ascension  
198 Health, Privia Health, Superior Health Plan, TX Association of Family Physicians, TX Medical  
199 Association, TX Pediatric Society, and Federally Qualified Health Care Centers statewide, for  
200 assisting with sharing information with families about this survey.

201  
202  
203 **Data Sharing Statement**

204 Texas CARES investigators are committed to data sharing. Granular results and user-specified  
205 data summaries are currently publicly available on the Texas CARES portal  
206 (<https://sph.uth.edu/projects/texascares/dashboard>). When baseline recruitment is complete, a  
207 deidentified individual level dataset will be available for download from the same portal.

208

209

210

211

212

213

214

215

216

217

218



## 219   **References**

- 220           1. American Academy of Pediatrics and the Children’s Hospital Association. Children and  
221           COVID-19: State Data Report. [https://www.aap.org/en/pages/2019-novel-coronavirus-](https://www.aap.org/en/pages/2019-novel-coronavirus-covid-19-infections/children-and-covid-19-state-level-data-report/)  
222           [covid-19-infections/children-and-covid-19-state-level-data-report/](https://www.aap.org/en/pages/2019-novel-coronavirus-covid-19-infections/children-and-covid-19-state-level-data-report/) Accessed November  
223           12, 2021.
- 224           2. Messiah SE, Valerio-Shewmaker MA, DeSantis, SM, et al. Estimated Prevalence of  
225           SARS-CoV-2 Antibodies in the Texas Pediatric Population, 2021. Preprints with the  
226           *Lancet*. Available at SSRN: <http://dx.doi.org/10.2139/ssrn.3868061>
- 227           3. Valerio-Shewmaker MA, DeSantis SM, et al. Strategies to estimate prevalence of SARS-  
228           CoV-2 antibodies in a Texas vulnerable population: results from phase I of the Texas  
229           Coronavirus Antibody REsponse Survey (TX CARES). medRxiv [Preprint]. 2021 Jul  
230           medRxiv doi: <https://doi.org/10.1101/2021.08.04.21261613>
- 231           4. DeSantis SM, León-Novelo LG, Swartz MD, et al. Estimation of total immunity to  
232           SARS-Cov-2 in Texas. medRxiv [Preprint]. 2021 medRxiv doi:  
233           <https://doi.org/10.1101/2021.08.05.21261610>
- 234           5. Roche. Elecsys® Anti-SARS-CoV-2. Package Insert 2020-07, V9.0; Material Numbers  
235           09203095190 and 09203079190. US Food and Drug Administration  
236           <https://www.fda.gov/media/137605/download>
- 237           6. Roche. Elecsys® Anti-SARS-CoV-2 S. Package Insert 2020-12, V1.0; Material  
238           Numbers 09289267190 and 09289275190. US Food and Drug Administration  
239           <https://www.fda.gov/media/144037/download>

241

242

243

244

245

246

247

248

249

250

251

252

253

254 **Table 1. Sars-CoV-2 antibody status over 3 timepoints (each separated by 2-3 months) by**  
 255 **symptom status and severity and descriptive characteristics.**

256

|                                          | Timepoint 1<br>(N=159) |             | Timepoint 2<br>(N=159) |            | Timepoint 3<br>(N=159) |            | p-value <sup>a</sup> |
|------------------------------------------|------------------------|-------------|------------------------|------------|------------------------|------------|----------------------|
|                                          | Positive               | Negative    | Positive               | Negative   | Positive               | Negative   |                      |
|                                          | 53 (33.3%)             | 106 (66.6%) | 61 (38.4%)             | 98 (61.6%) | 67 (42.1%)             | 92 (57.9%) |                      |
| <b>Symptom Status</b>                    |                        |             |                        |            |                        |            | 0.498                |
| Symptomatic                              | 25 (50.0%)             | 30 (29.4%)  | 26 (44.8%)             | 29 (30.9%) | 26 (40.6%)             | 29 (33.0%) |                      |
| Asymptomatic                             | 25 (50.0%)             | 72 (70.6%)  | 32 (55.2%)             | 65 (69.1%) | 38 (59.4%)             | 59 (67.0%) |                      |
| Missing                                  | 3                      | 4           | 3                      | 4          | 3                      | 4          |                      |
| <b>Symptom Severity<sup>b</sup></b>      |                        |             |                        |            |                        |            | 0.872                |
| Mild-Moderate                            | 21 (87.5%)             | 24 (80.0%)  | 21 (84.0%)             | 24 (82.8%) | 21 (84.0%)             | 24 (82.8%) |                      |
| Severe                                   | 3 (12.5%)              | 6 (20.0%)   | 4 (16.0%)              | 5 (17.2%)  | 4 (16.0%)              | 5 (17.2%)  |                      |
| <b>Sex</b>                               |                        |             |                        |            |                        |            | 0.942                |
| Males                                    | 22 (42.3%)             | 43 (40.6%)  | 25 (41.7%)             | 40 (40.8%) | 28 (42.4%)             | 37 (40.2%) |                      |
| Females                                  | 30 (57.7%)             | 63 (59.4%)  | 35 (58.3%)             | 58 (59.2%) | 38 (57.6%)             | 55 (59.8%) |                      |
| <b>Age Group</b>                         |                        |             |                        |            |                        |            | 0.977                |
| 5-9 years                                | 15 (28.3%)             | 23 (21.7%)  | 16 (26.2%)             | 22 (22.4%) | 17 (25.4%)             | 21 (22.8%) |                      |
| 10-14 years                              | 20 (37.7%)             | 48 (45.3%)  | 25 (41.0%)             | 43 (43.9%) | 30 (44.8%)             | 38 (41.3%) |                      |
| 15-19 years                              | 18 (34.0%)             | 35 (33.0%)  | 20 (32.8%)             | 33 (33.7%) | 20 (29.9%)             | 33 (35.9%) |                      |
| <b>Body Mass Index Group<sup>c</sup></b> |                        |             |                        |            |                        |            | 0.117                |
| Underweight                              | 1 (2.1%)               | 4 (4.0%)    | 1 (1.8%)               | 4 (4.3%)   | 2 (3.3%)               | 3 (3.4%)   |                      |
| Healthy                                  | 31 (64.6%)             | 66 (65.3%)  | 37 (66.1%)             | 60 (64.5%) | 40 (65.6%)             | 57 (64.8%) |                      |
| Overweight                               | 8 (16.7%)              | 21 (20.8%)  | 10 (17.9%)             | 19 (20.4%) | 11 (18.0%)             | 18 (20.5%) |                      |
| Obesity                                  | 8 (16.7%)              | 10 (9.9%)   | 8 (14.3%)              | 10 (10.8%) | 8 (13.1%)              | 10 (11.4%) |                      |
| Missing                                  | 5                      | 5           | 5                      | 5          | 6                      | 4          |                      |

257

258 <sup>a</sup>p value calculated from likelihood ratio test

259 <sup>b</sup>Percent of symptomatic children total

260 <sup>c</sup>Based on standardized body mass index percentiles adjusted for age and sex

261 (<https://www.cdc.gov/nccdphp/dnpao/growthcharts/resources/sas.htm>)

262

263

264

265

266

267

268

269

270

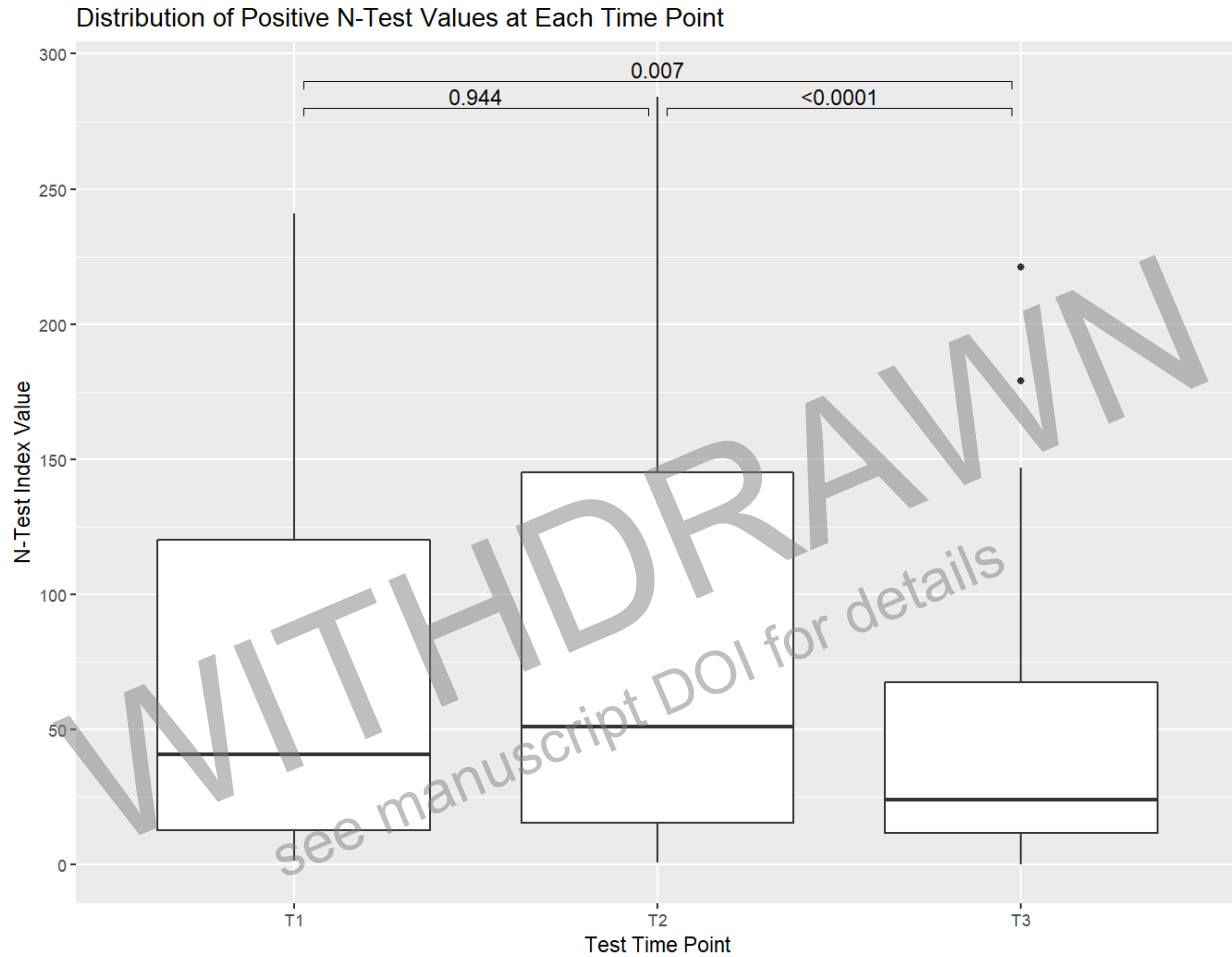

271 **Figure 1.** Boxplots of N-test values at each time point.

272 Boxplot for the N-test values across the three timepoints for the sample that were positive at the first timepoint  
273 (N=53). The N-test value denotes prior COVID-19 infection. Each box represents data falling between the 25<sup>th</sup> and  
274 the 75<sup>th</sup> percentiles. The horizontal bar within the box represents the median, and the whiskers extend 1.5 times the  
275 interquartile range below the 25<sup>th</sup> and above the 75<sup>th</sup> percentiles, and the points that lie beyond the whiskers can  
276 be considered extreme values.

277 P values calculated by Wilcoxon Signed Rank test. Note that this is not a test for the difference in medians, but  
278 rather a non-parametric test for differences in sets of pairs.

279 \*significant at the p=0.05 level

280

281
